# Supplementary material
Source: Royal Society of Chemistry journal article supplement (doi:10.1039/d6cc01625a)
Supplement: d6cc01625a1.pdf [file d6cc01625a1.pdf]

## Supplementary Information

### **Photochromism via Reversible Transformation of Photoinduced Chiral Free Radicals**

Xiaoyang Zhang,<sup>#a</sup> Shengwen Bao,<sup>#b, c</sup> Chenfeng He,<sup>a</sup> Shan Li,<sup>b</sup> Guoquan Zhou,<sup>a</sup>  
Yunhui Wan,<sup>\*a</sup> Ying Liu,<sup>\*d</sup> Danfeng Ye,<sup>\*a</sup> Liangliang Zhu<sup>b</sup>

- a College of Material Science and Chemical Engineering, Ningbo University of Technology, Ningbo 315211, P. R. China.
- b State Key Laboratory of Molecular Engineering of Polymers, Department of Macromolecular Science, Fudan University, Shanghai 200438, China.
- c School of Resource and Environmental Engineering, Shanghai Polytechnic University, Shanghai, P. R. China.
- d Institute of Translational Medicine, Shanghai University, Shanghai, P. R. China.

\*Corresponding author

E-mail address: liuying1984@shu.edu.cn, wyh@nbut.edu.cn, yedanfeng@nbut.edu.cn

## 1. General

All reactions were purchased from Aldrich and available chemicals were used without further purification.  $^1\text{H}$  NMR and  $^{13}\text{C}$  NMR spectra were measured on a Bruker 500 spectrometer in  $\text{DMSO-}d_6$  at room temperature. Mass spectra were measured on a Agilent 6545 QTOF. The UV-Vis absorption spectra were recorded on a Perkin-Elmer Lambda 750 spectrophotometer. The emission spectra were measured using an Edinburgh FLS1000 equipped with a xenon lamp. Fourier transform infrared (FTIR) spectroscopy was carried out with a Thermofisher Nicolet 6700 spectrometer using KBr pellets as the sample matrix in the wavenumber range of  $400\text{--}4000\text{ cm}^{-1}$ . The CD spectra were obtained from J1821410 Spectrophotometer.

## 2. Synthesis Procedures.

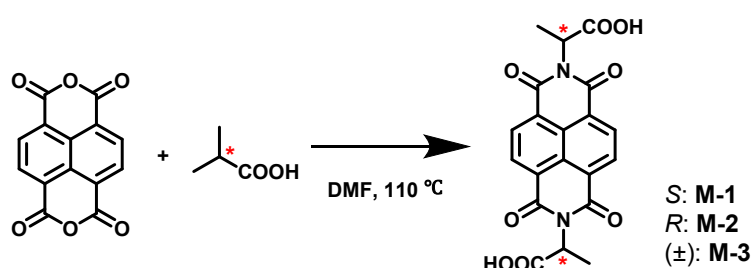

**Scheme S1.** Synthetic route of **M-1**, **M-2**, **M-3**

**Synthesis of M-1:** A mixture of 1,4,5,8-naphthalenetetracarboxylic acid dianhydride (268.0 mg, 1.00 mmol) and *S*-alanine (267 mg, 3.0 mmol) was dissolved in anhydrous DMF (20.0 mL) under a nitrogen atmosphere. The reaction mixture was stirred at 110 °C for 12 h. After cooling to room temperature, the solution was poured into aqueous HCl (30 mL, 1 M) to precipitate the product. The resulting solid was collected and washed with diethyl ether to afford M-1 as a yellow solid (307.5 mg, 75.0% yield).  $^1\text{H}$  NMR (500 MHz,  $\text{DMSO-}d_6$ ):  $\delta$  12.83 (s, 2H), 8.73 (s, 4H), 5.70 – 5.53 (m, 2H), 1.71 – 1.49 (m, 6H).  $^{13}\text{C}$  NMR (150 MHz,  $\text{DMSO-}d_6$ ):  $\delta$  171.4, 162.6, 131.4, 126.7, 126.7, 49.5, 14.9. HRMS (ESI): calculated for  $\text{C}_{20}\text{H}_{15}\text{N}_2\text{O}_8$   $[\text{M}+\text{H}]^+$ , 411.0823; found: 411.0836.

**Synthesis of M-2:** A mixture of 1,4,5,8-naphthalenetetracarboxylic acid dianhydride (268.0 mg, 1.00 mmol) and *R*-alanine (267 mg, 3.0 mmol) was dissolved in anhydrous DMF (20.0 mL) under a nitrogen atmosphere. The reaction mixture was stirred at 110 °C for 12 h. After cooling to room temperature, the solution was poured into aqueous HCl (30 mL, 1 M) to precipitate the product. The resulting solid was collected and washed with diethyl ether to afford M-1 as a yellow solid (323.9 mg, 79.0% yield).  $^1\text{H}$  NMR (500 MHz,  $\text{DMSO-}d_6$ ):  $\delta$  12.78 (s, 1H), 8.74 (s, 4H), 5.64 – 5.59 (m, 2H), 1.60 – 1.55 (m, 6H).  $^{13}\text{C}$  NMR (150 MHz,  $\text{DMSO-}d_6$ ):  $\delta$  171.5, 162.5, 131.4, 126.7, 49.5, 14.9. HRMS (ESI): calculated for  $\text{C}_{20}\text{H}_{15}\text{N}_2\text{O}_8$   $[\text{M}+\text{H}]^+$ , 411.0823; found: 411.0844.

**Synthesis of M-3:** A mixture of 1,4,5,8-naphthalenetetracarboxylic acid dianhydride (268.0 mg, 1.00 mmol) and alanine (267 mg, 3.0 mmol) was dissolved in anhydrous DMF (20.0 mL) under a nitrogen atmosphere. The reaction mixture was stirred at 110 °C for 12 h. After cooling to room temperature, the solution was poured into aqueous HCl (30 mL, 1 M) to precipitate the product. The resulting solid was collected and washed with diethyl ether to afford M-1 as a yellow solid (299.3 mg, 73.0% yield).  $^1\text{H}$  NMR (500 MHz,  $\text{DMSO-}d_6$ ):  $\delta$  12.83 (s, 2H), 8.73 (s, 4H), 5.70 – 5.53 (m, 2H), 1.71 – 1.49 (m, 6H).  $^{13}\text{C}$  NMR (150 MHz,  $\text{DMSO-}d_6$ ):  $\delta$  171.6, 162.6, 131.4, 126.7, 49.5, 14.6.

HRMS (ESI): calculated for  $C_{20}H_{15}N_2O_8$   $[M+H]^+$ , 411.0823; found: 411.0829.

### 3. Additional results

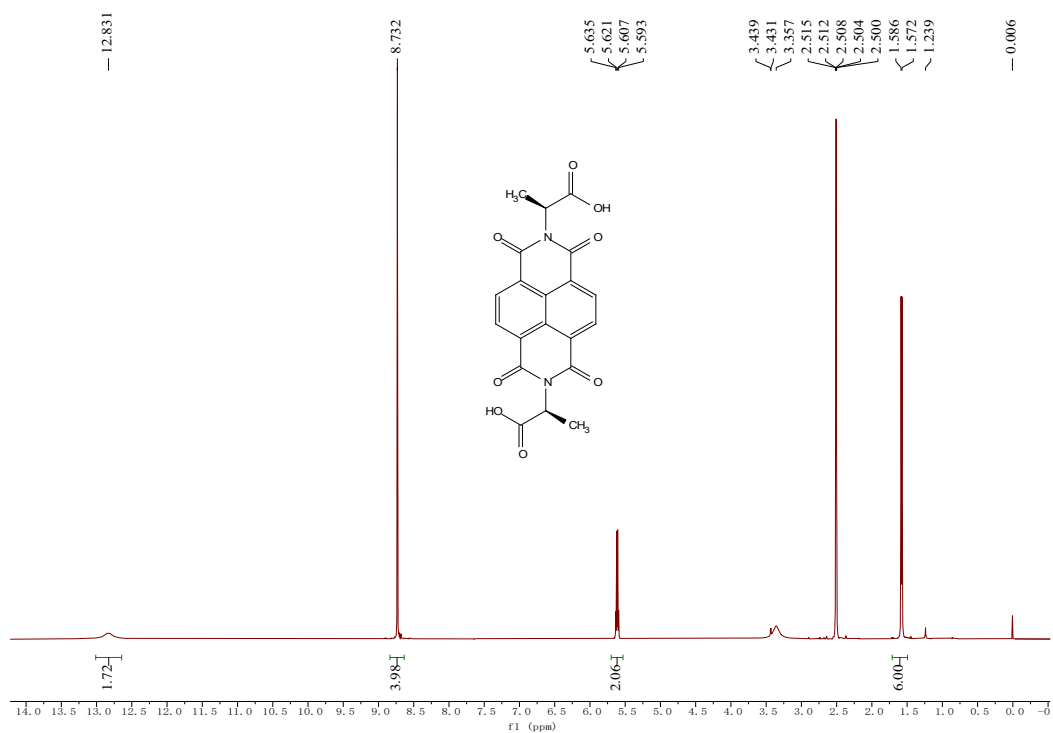

Figure S1.  $^1H$  NMR (500 MHz,  $DMSO-d_6$ , 298 K) spectrum of compound **M-1**.

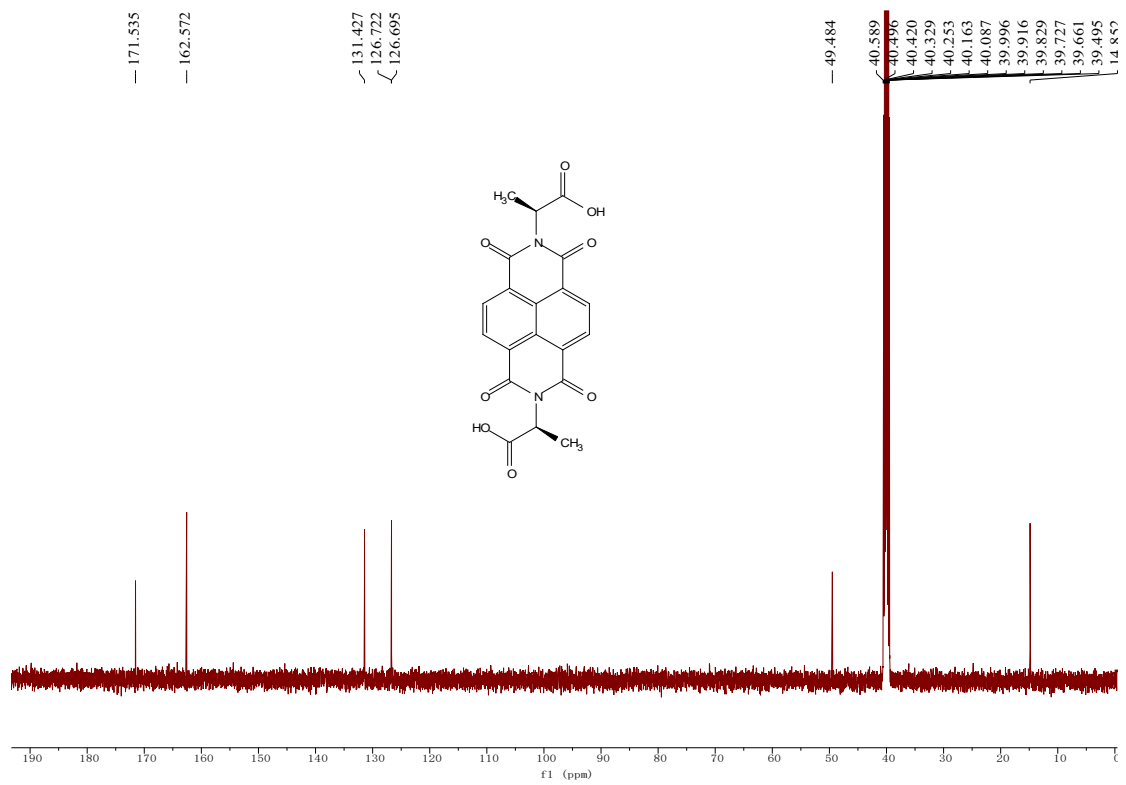

Figure S2. <sup>13</sup>C NMR (125 MHz, DMSO-*d*<sub>6</sub>, 298 K) spectrum of compound M-1.

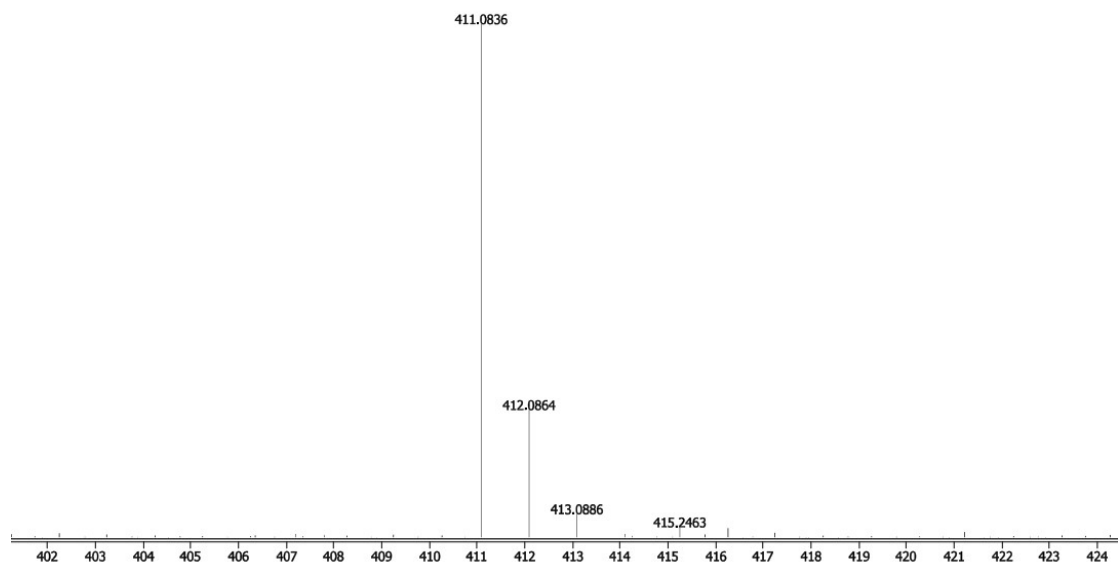

Figure S3. HRMS spectrum of compound M-1.

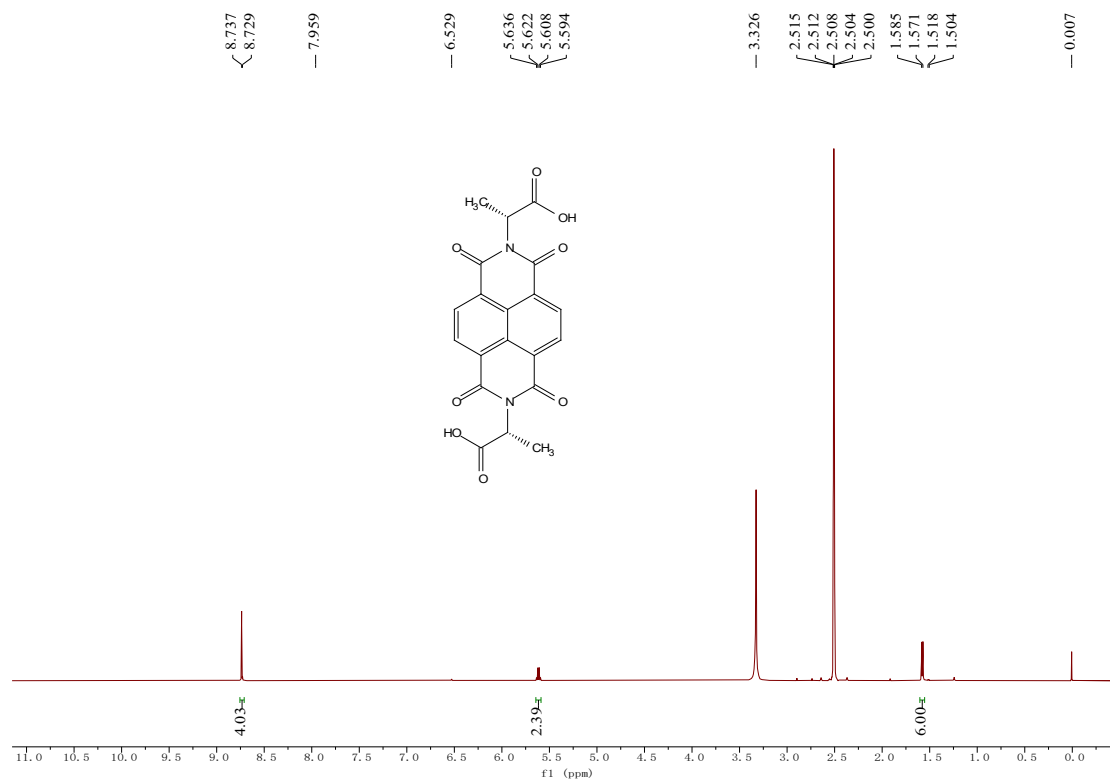

Figure S4.  $^1\text{H NMR}$  (500 MHz,  $\text{DMSO-}d_6$ , 298 K) spectrum of compound **M-2**.

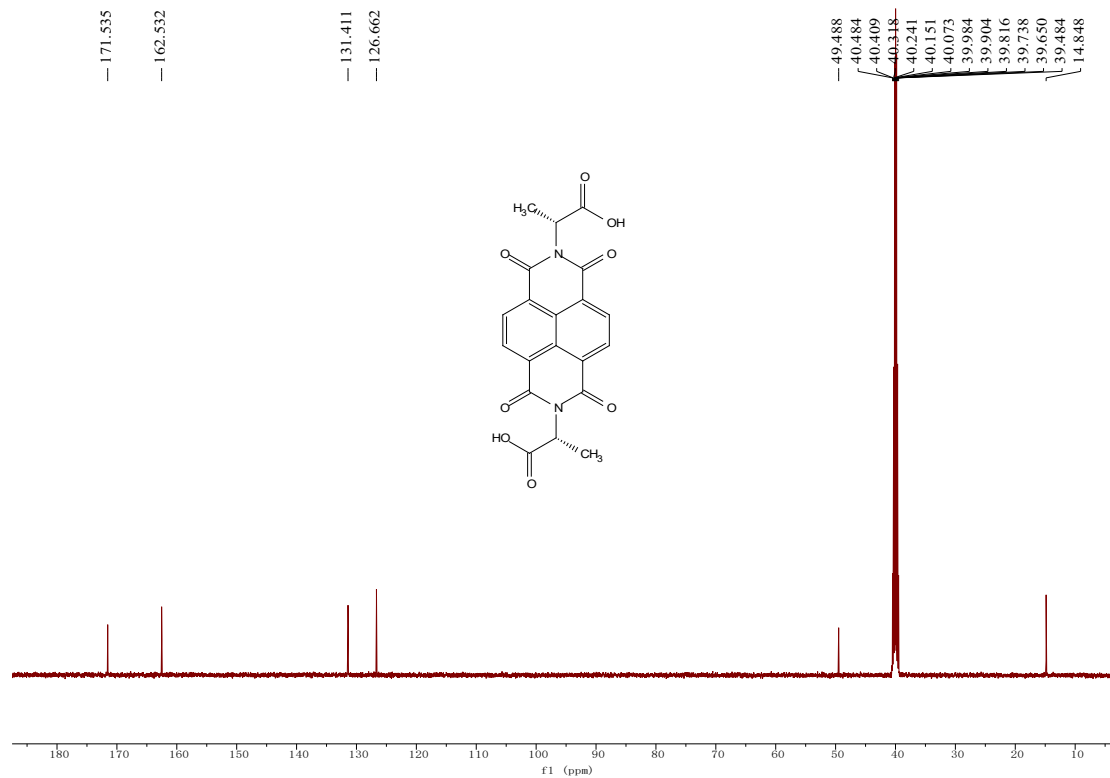

Figure S5.  $^{13}\text{C NMR}$  (125 MHz,  $\text{DMSO-}d_6$ , 298 K) spectrum of compound **M-2**.

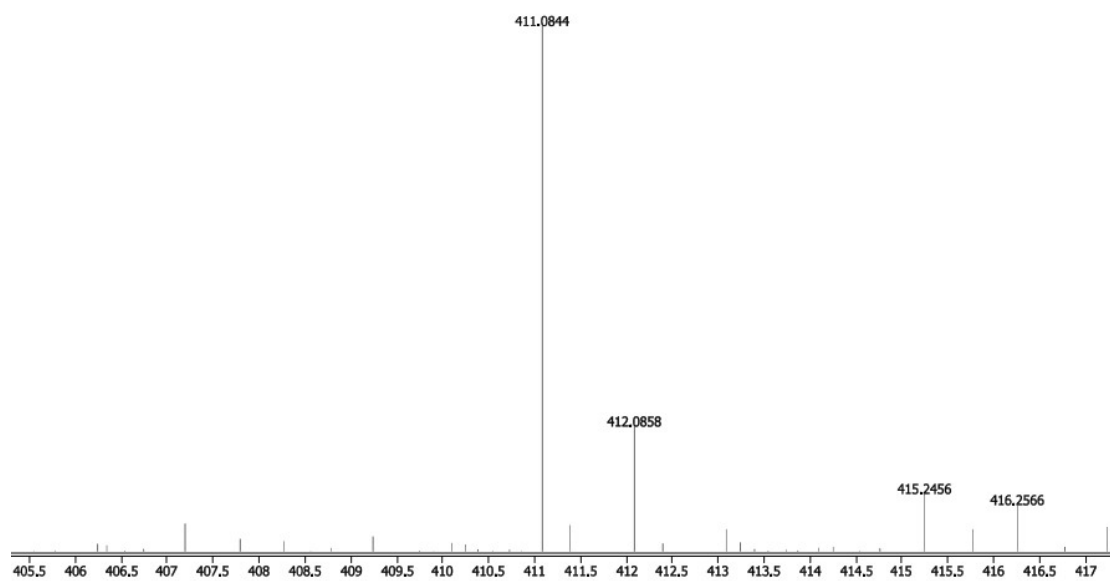

Figure S6. HRMS spectrum of compound M-2.

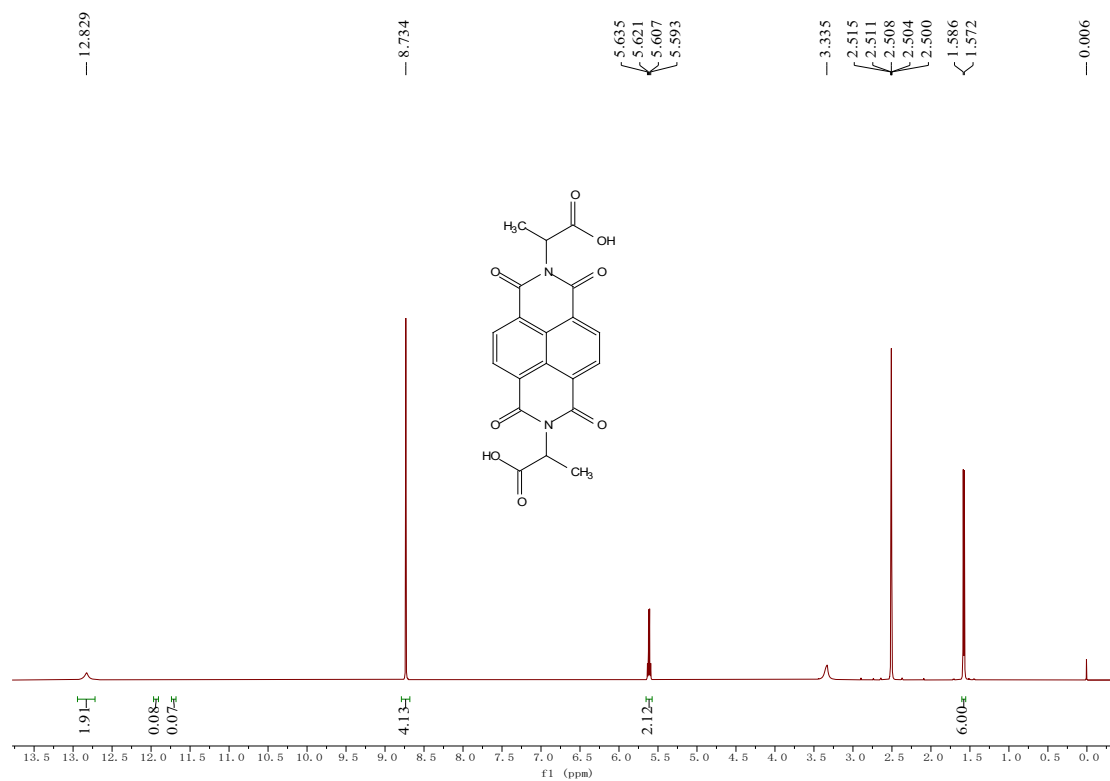

Figure S7. <sup>1</sup>H NMR (500 MHz, DMSO-*d*<sub>6</sub>, 298 K) spectrum of compound M-3.

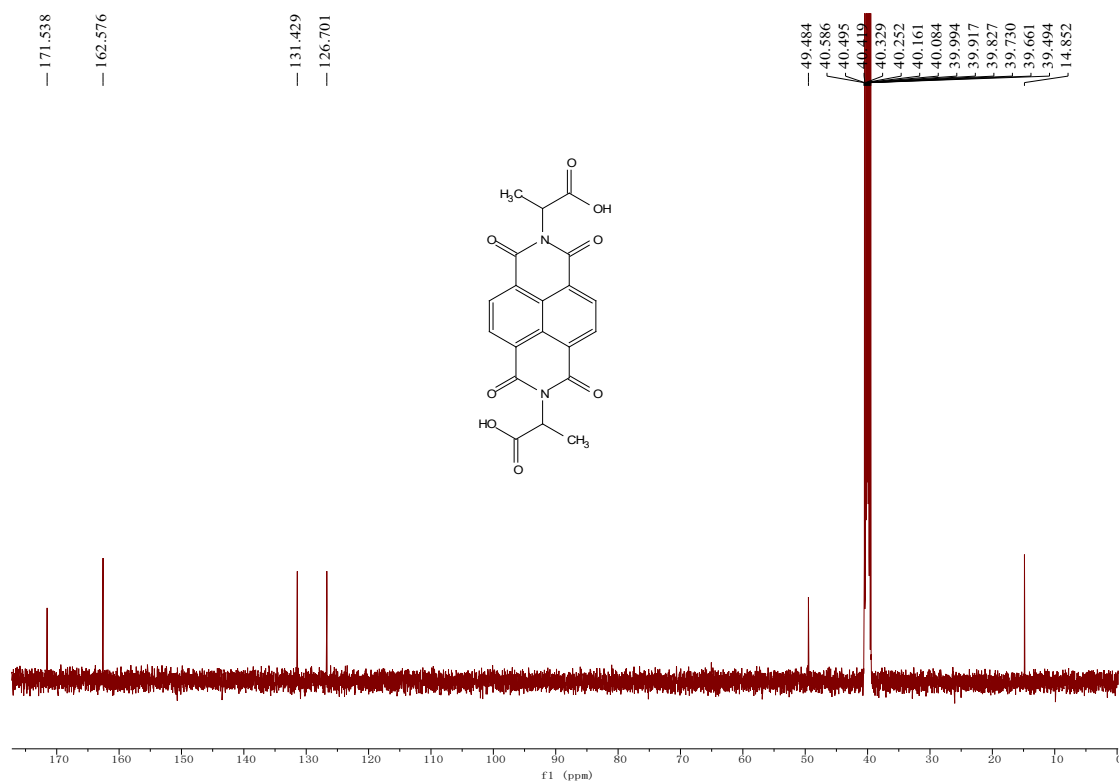

Figure S8. <sup>13</sup>C NMR (125 MHz, DMSO-*d*<sub>6</sub>, 298 K) spectrum of compound M-3.

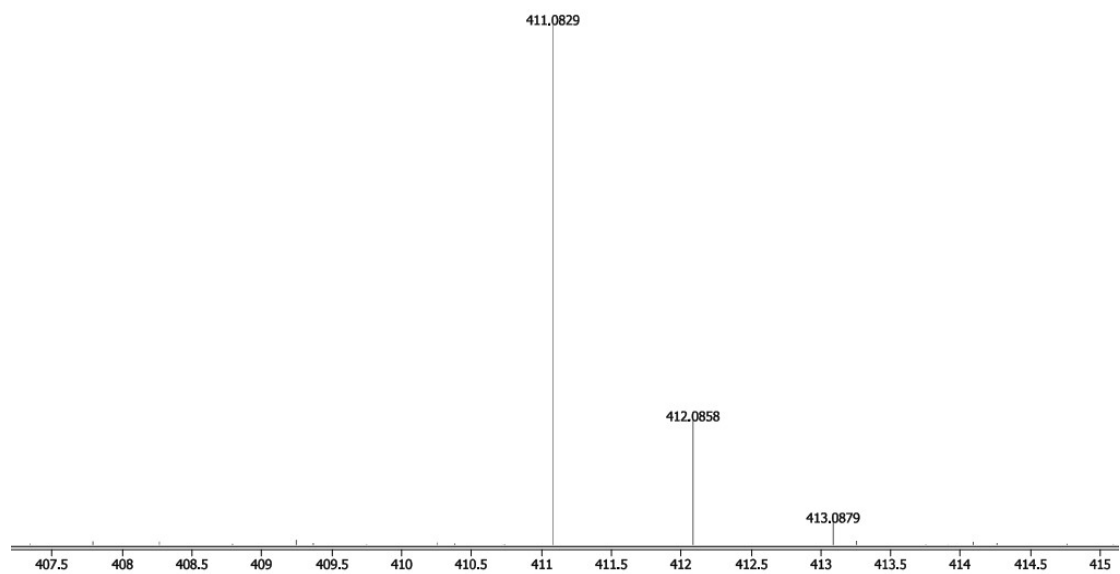

Figure S9. HRMS spectrum of compound M-3.

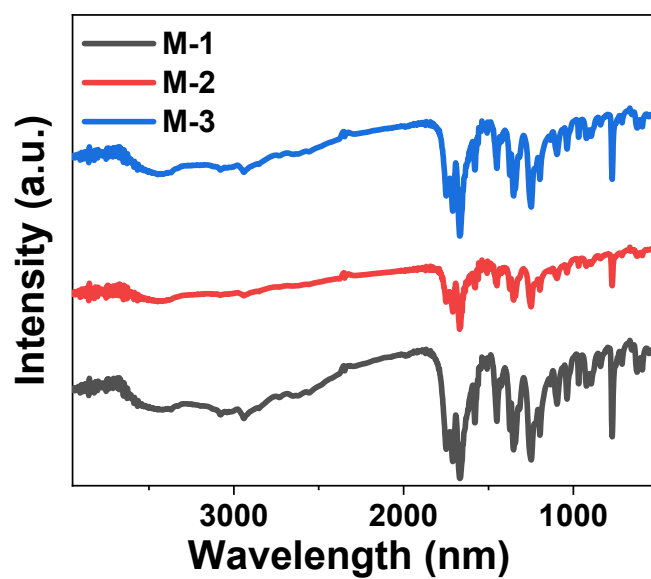

Figure S10. FT-IR spectrum of compound M-1, M-2 and M-3.

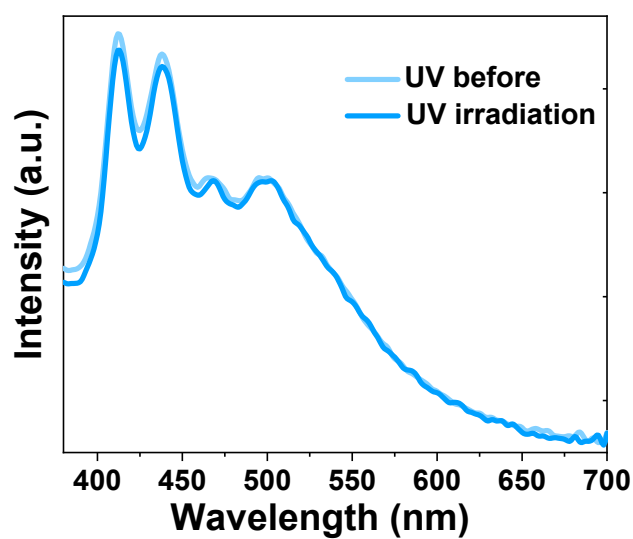

Figure S11. PL spectra of the PVA film before and after UV irradiation.

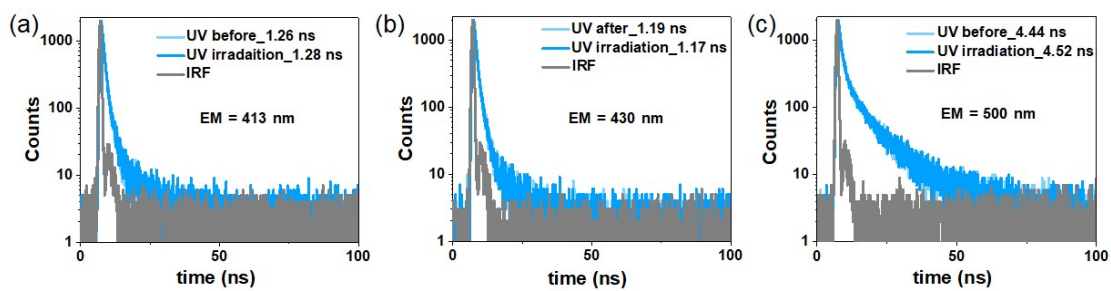

Figure S12. PL lifetime spectra of the PVA film before and after UV irradiation ( $\lambda_{em} = 413, 430,$

500 nm).

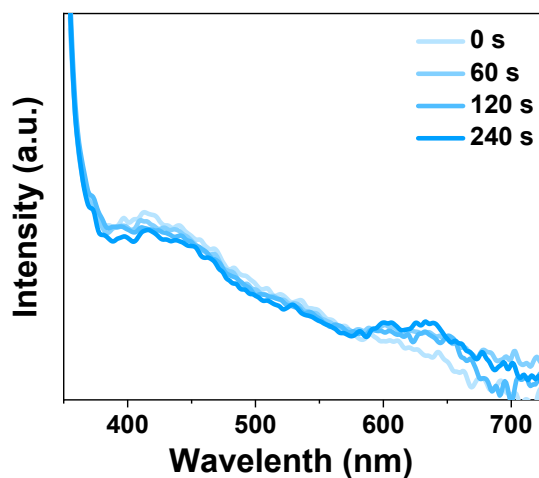

Figure S13. PL spectra of 0.2 wt% M-1@PVA film before and after UV irradiation.

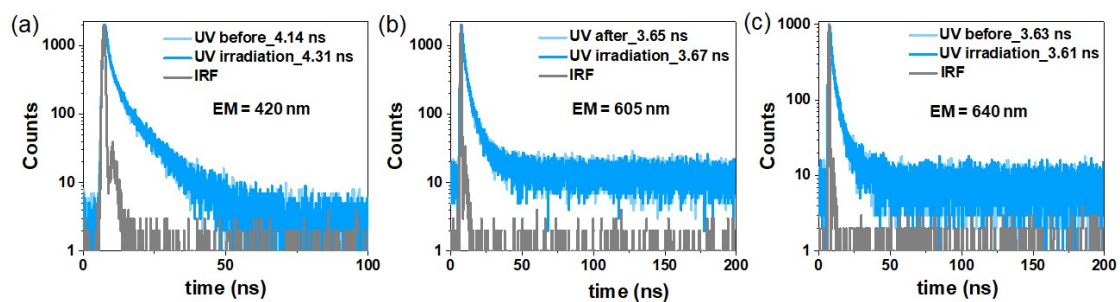

Figure S14. PL lifetime decay of 0.2 wt% M-1@PVA film before and after UV irradiation ( $\lambda_{em} = 420, 605, 640$  nm).

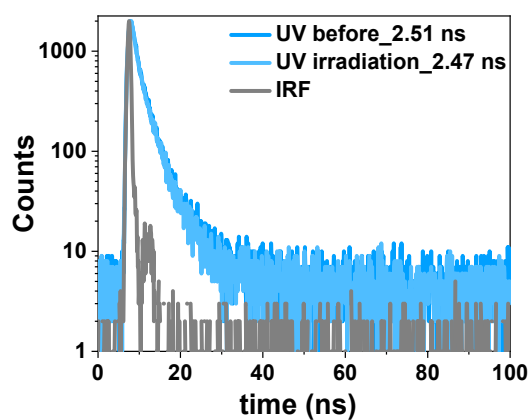

Figure S15. PL lifetime spectra of 3 wt% M-1@PVA film before and after UV irradiation ( $\lambda_{em} = 640$  nm).

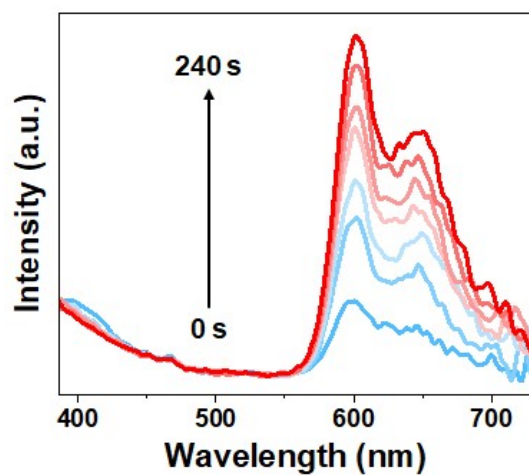

Figure S16. PL spectra of 3 wt% **M-2@PVA** film upon UV irradiation from 0 to 240 s.

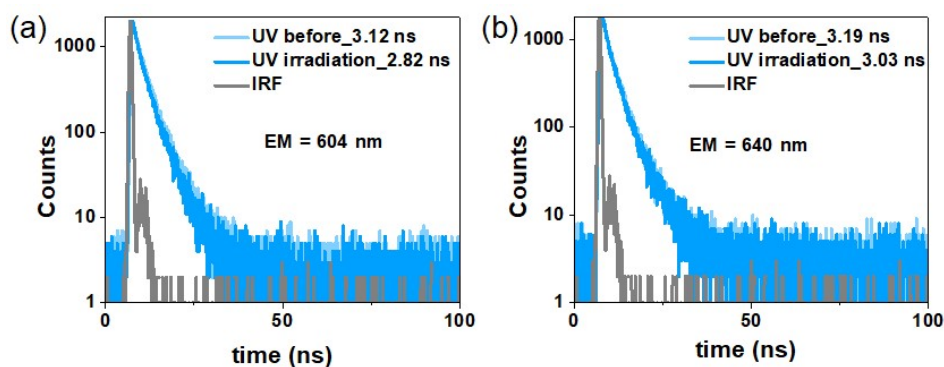

Figure S17. PL lifetime spectra of 3 wt% **M-2@PVA** film before and after UV irradiation ( $\lambda_{em} = 604$  nm and 640 nm).

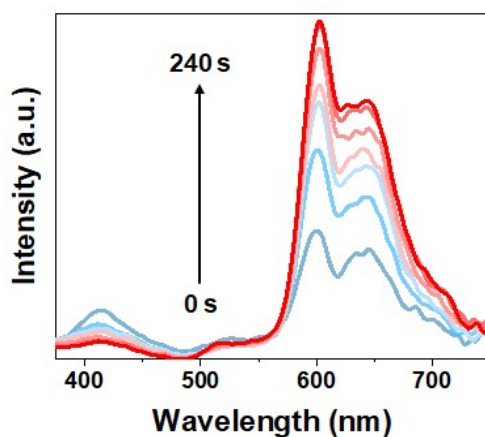

Figure S18. PL spectra of 3 wt% **M-3@PVA** film upon UV irradiation from 0 to 240 s.

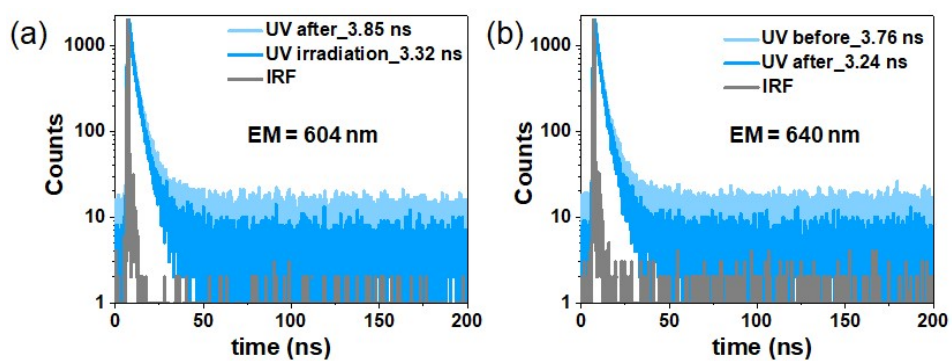

Figure S19. PL lifetime spectra of 3 wt% M-3@PVA film before and after UV irradiation ( $\lambda_{em} = 604$  nm and 640 nm).

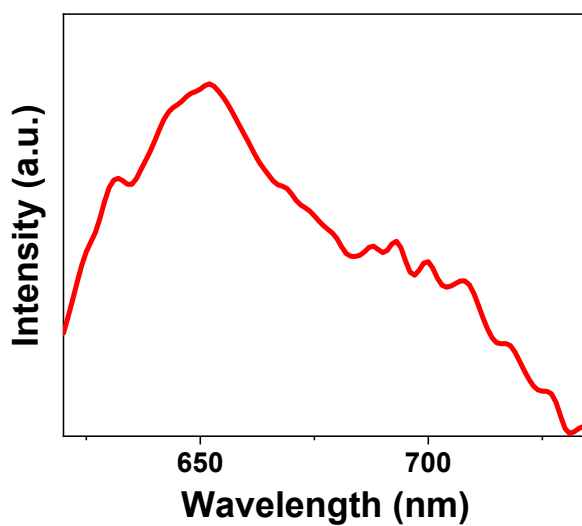

Figure S20. PL spectrum of the 3 wt% M-1@PVA film upon 600 nm excitation after UV irradiation.

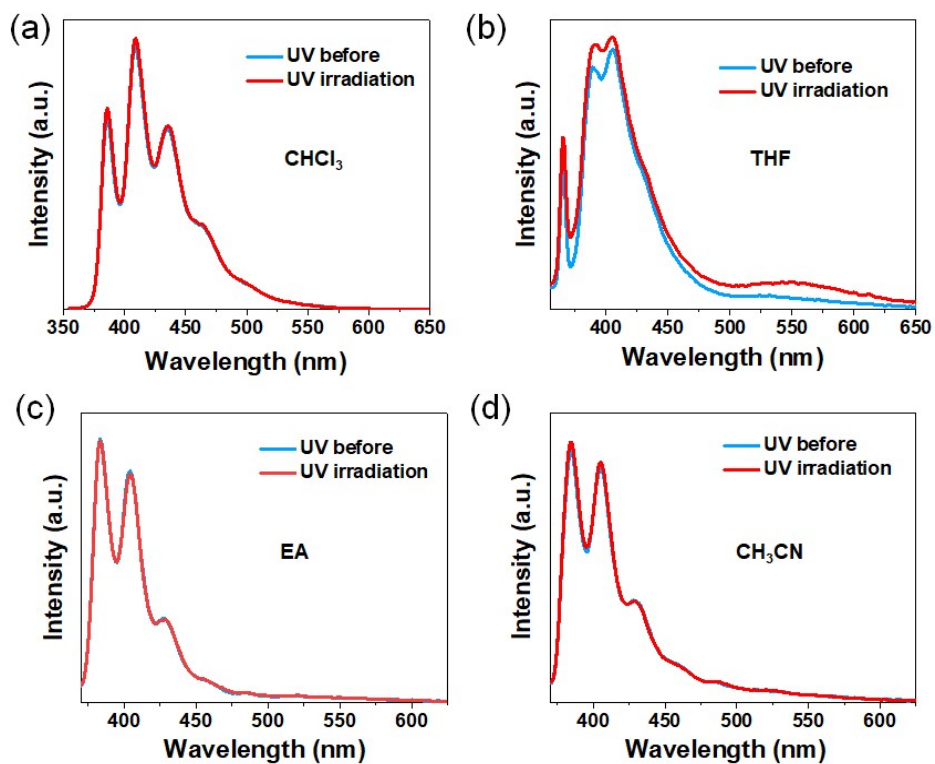

Figure S21. PL spectra of **M-1** (1x10<sup>-5</sup> M) in various polar solvents (CHCl<sub>3</sub>, THF, EA, ACN) before and after UV irradiation.

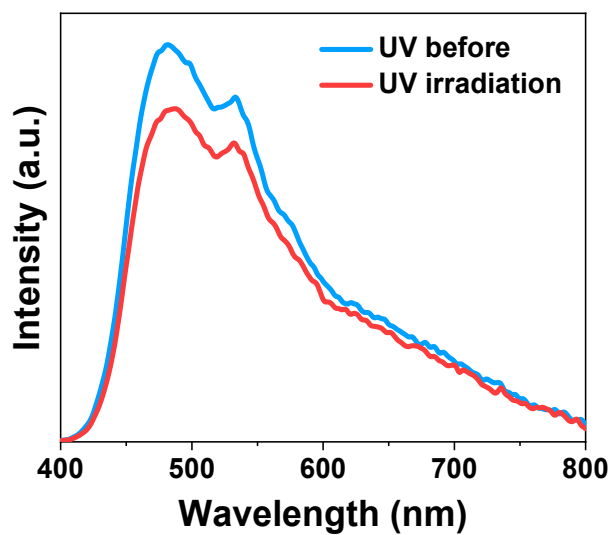

Figure S22. PL spectra of **M-1** in solid before and after UV irradiation.

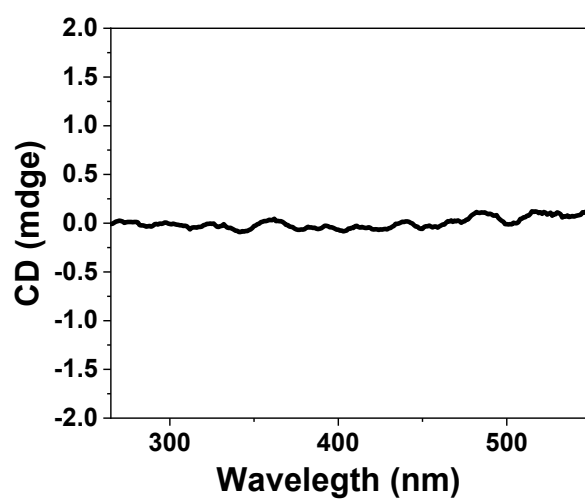

Figure S23. CD signal of M-3@PVA film.

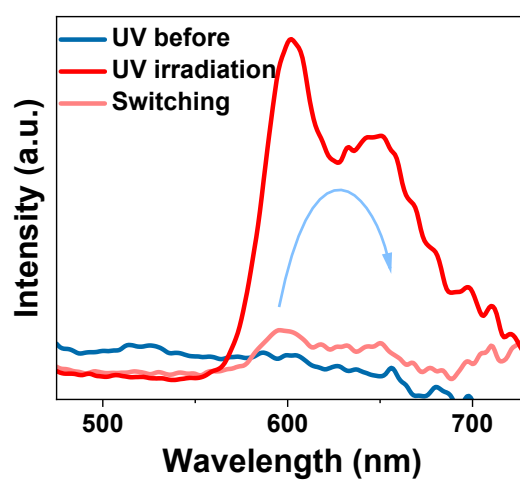

Figure S24. PL spectra of 3 wt% M-1@PVA film before and after UV irradiation ( $\lambda_{em} = 640$  nm).

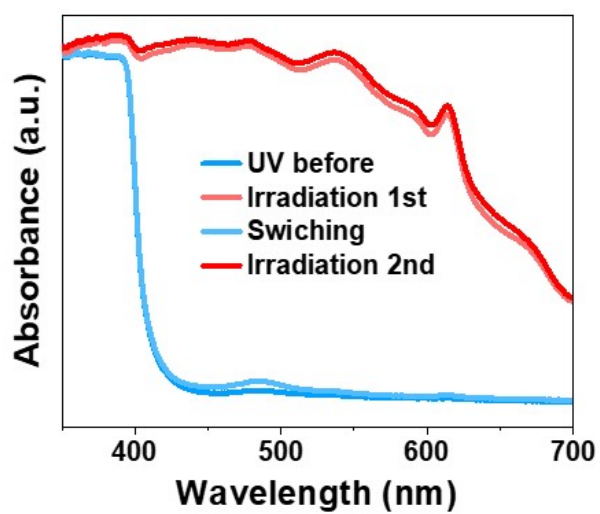

Figure S25. Absorption spectra of the **M-1@PVA** film before and after UV irradiation.

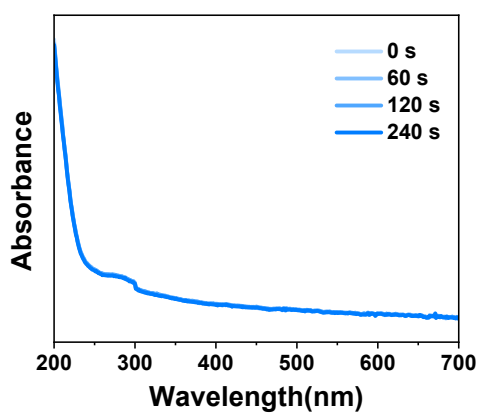

Figure S26. Absorption spectra of the pure PVA film under UV irradiation.

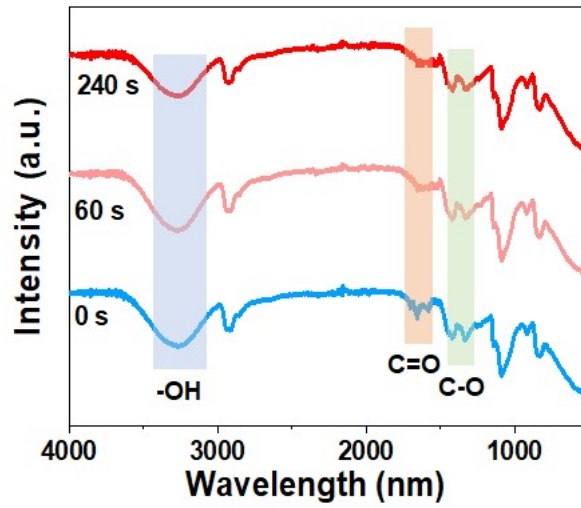

Figure S27. FTIR spectra of the M-1@PVA film under UV irradiation.

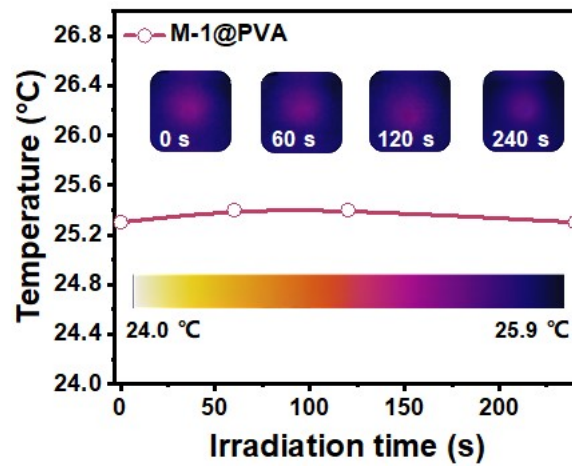

Figure S28. Photothermal measurements of the M-1@PVA film under UV irradiation.
